# Supplementary material for: MOF-derived biochar composites for enhanced high performance photocatalytic degradation of tetracycline hydrochloride
Source: Royal Society of Chemistry journal article supplement (doi:10.1039/d2ra05819g), 2022-01-01
Supplement: d2ra05819g1.pdf [file d2ra05819g1.pdf]

## Supporting Information

### MOF-derived Biochar Composites for Enhanced High Performance Photocatalytic Degradation of Tetracycline Hydrochloride

Zhiwei Liu<sup>a</sup>, Yi Li<sup>a</sup>, Chen Li<sup>a</sup>, Kunyapat Thummavichai<sup>b,c</sup>, Chen Feng<sup>a</sup>, Zhen Li<sup>a</sup>, Song  
Liu<sup>a</sup>, Shenghua Zhang<sup>a\*</sup>, Nannan Wang<sup>a\*</sup>, Yanqiu Zhu<sup>a,b</sup>

*\* Corresponding author. Shenghua Zhang, Nannan Wang*

E-mail address: [shzhang@gxu.edu.cn](mailto:shzhang@gxu.edu.cn), [wangnannan@gxu.edu.cn](mailto:wangnannan@gxu.edu.cn)

<sup>a</sup> Guangxi Institute Fullerene Technology (GIFT), Key Laboratory of New Processing  
Technology for Nonferrous Metals and Materials, Ministry of Education, School of  
Resources, Environment and Materials. Guangxi University, Nanning 530004, China

<sup>b</sup> College of Engineering, Department of Mathematics and Physical Sciences,  
University of Exeter, Exeter, EX4 4QF, United Kingdom

<sup>c</sup> Faculty of Engineering and Environment, Northumbria University, Newcastle upon  
Tyne NE1 8ST, United Kingdom

## 1. Preparation of NSCDBC/MIL-125(Ti) composite catalyst

NSCM-x: Firstly, added 2 mL of anhydrous methanol and 18 mL of DMF to the beaker, then add 25 mg of NSCDBC while stirring, and stirred for 30 min. Then 1 g of H<sub>2</sub>BDC was added while stirring and 0.568 mL of Ti<sub>4</sub>(OCH<sub>3</sub>)<sub>16</sub> was added after mixing uniformly. Finally sonicated for 20 min to obtain the colloid. After cooling to room temperature, the solution was centrifuged at 8000 rpm·min<sup>-1</sup> for 5 min using DMF and methanol three times and dried under vacuum at 80 °C for 12 h. The powder obtained was named NSCM-5 according to the content of NSCDBC in the composite. NSCM-10, NSCM-20 and NSCM-30 correspond to 50 mg, 100 mg and 150 mg of NSCDBC addition, respectively.

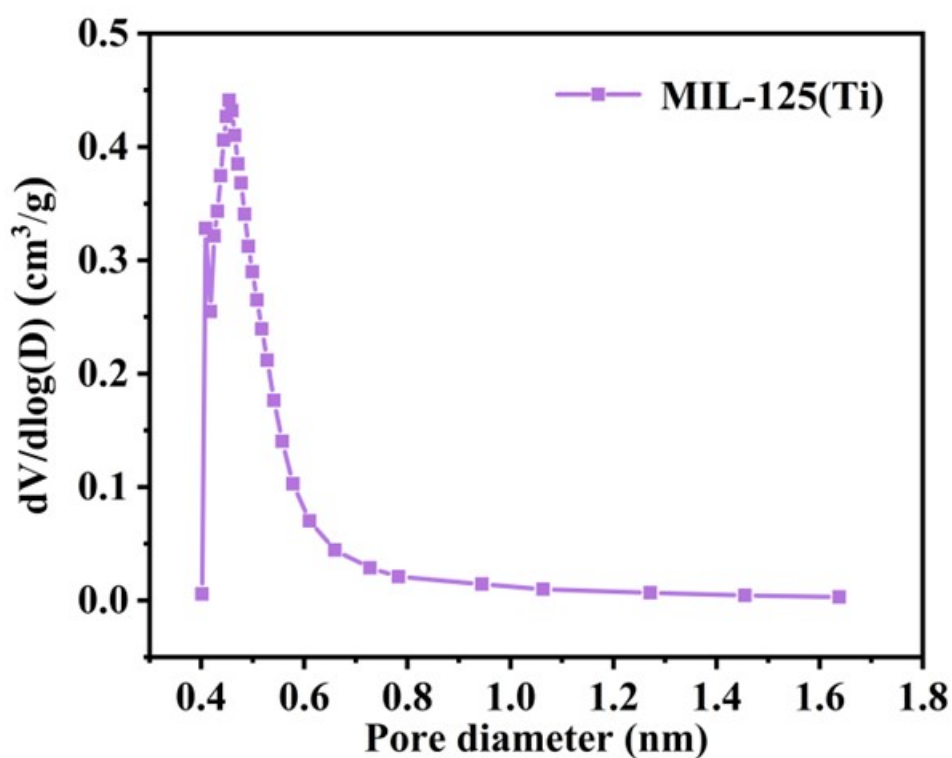

Fig. S1 Pore size distribution of pure MIL-125(Ti) by using the Horvath-Kawazoe method.

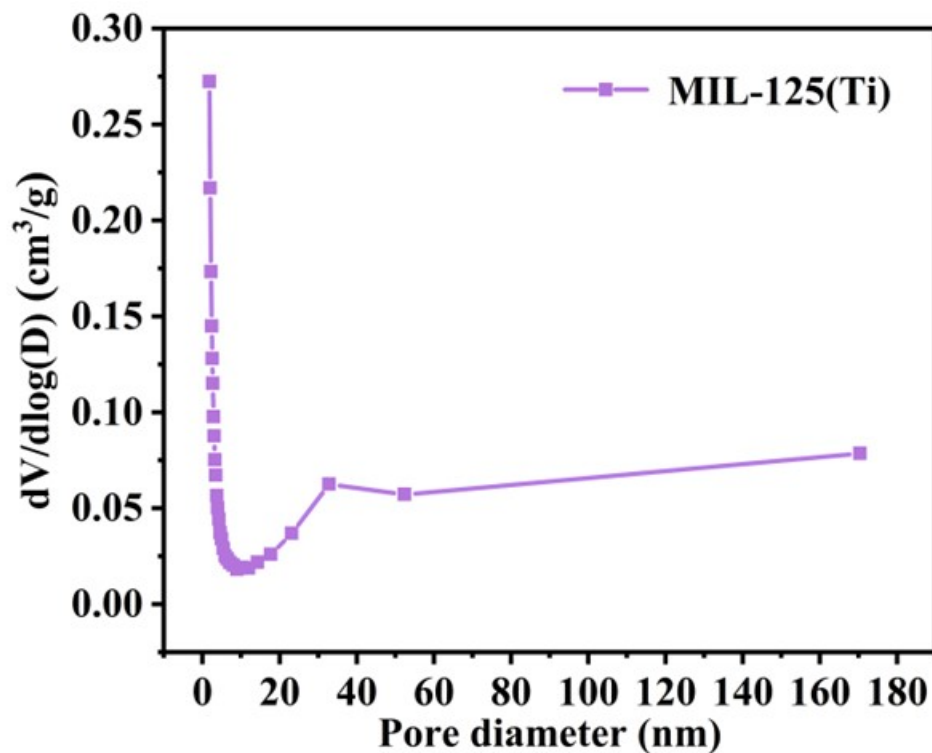

Fig. S2 Pore size distribution of pure MIL-125(Ti) by using the Barrett-Joyner-Halenda method.

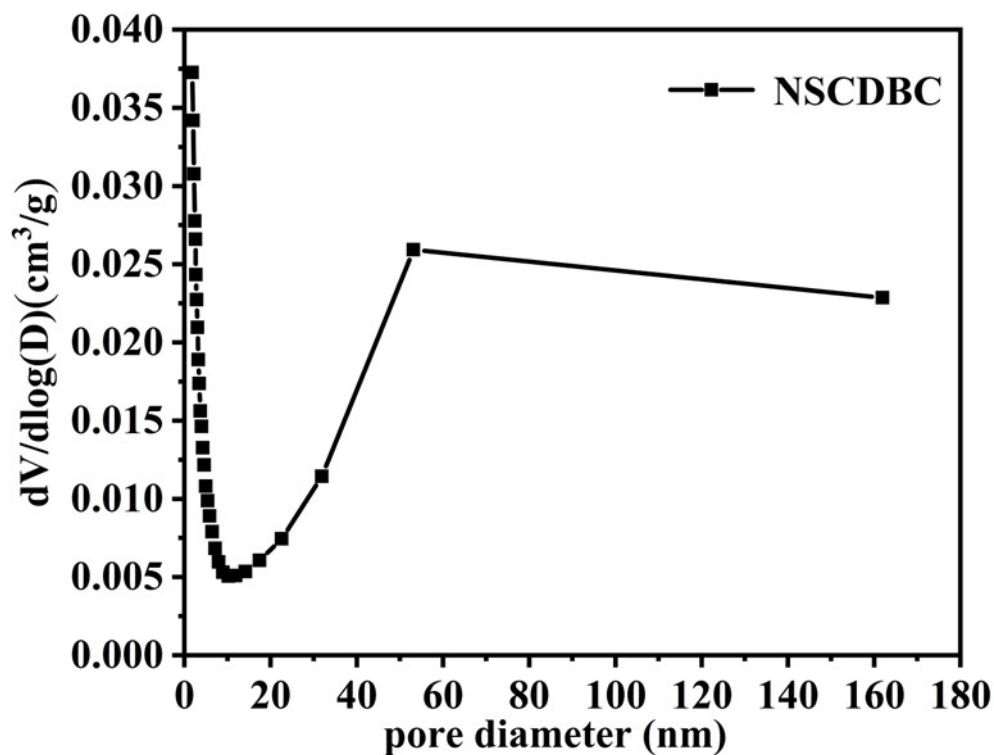

Fig. S3 Pore size distribution of NSCDBC.

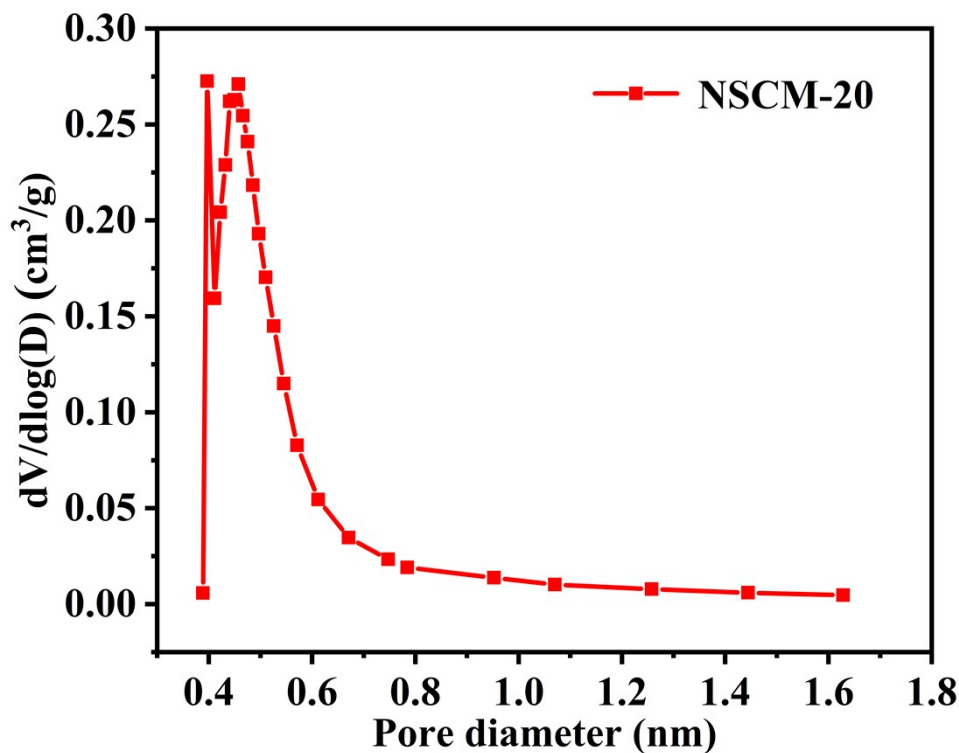

Fig. S4 Pore size distribution of NSCM-20.

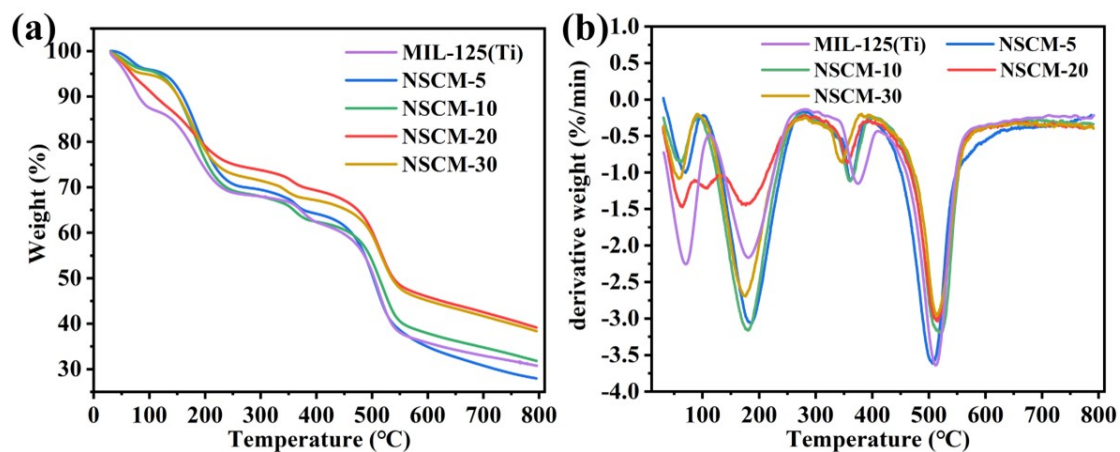

Fig. S5 (a) TGA and (b) DTG patterns of the prepared samples.

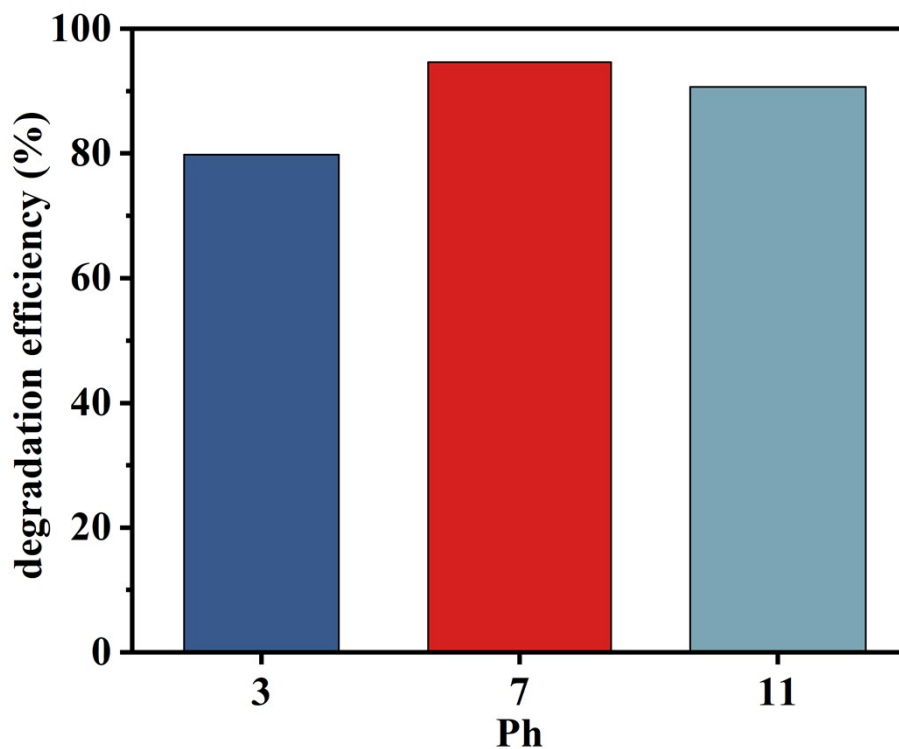

Fig. S6 Degradation rate of TC by NSCM-20 with different Ph.

Table S1. Data of Wastewater Treatment Processes using TiO<sub>2</sub>/Biochar Systems

| material                  | feedstock     | pyrolysis temp (°C) | pollution        | initial pollution concentration (mg/L) | applied dose (g/L) | degradation method                         | removal efficiency (%) | ref |
|---------------------------|---------------|---------------------|------------------|----------------------------------------|--------------------|--------------------------------------------|------------------------|-----|
| TiO <sub>2</sub> /biochar | hemp stem     | 500                 | ammonia nitrogen | 100                                    | 0.03               | catalysis (UV)                             | ~99.0                  | (1) |
| TiO <sub>2</sub> /biochar | Daphnia magna | 325                 | sulfamethoxazole | 10                                     | 5.00               | adsorption + photocatalytic oxidation (UV) | 91.0                   | (2) |
| TiO <sub>2</sub> /biochar | reed straw    | 300                 | sulfamethoxazole | 10                                     | 1.25               | adsorption + photocatalysis                | 91.3                   | (3) |

|                           |                              |     |                  |        |      |                                      |      |           |
|---------------------------|------------------------------|-----|------------------|--------|------|--------------------------------------|------|-----------|
|                           |                              |     |                  |        |      | (UV)                                 |      |           |
| TiO <sub>2</sub> /biochar | paper sludge and wheat husks |     | Reactive Blue 69 | 20     | 1.50 | sonocatalysis (UV)                   | 98.1 | (4)       |
| TiO <sub>2</sub> /biochar | macroalgae                   | 650 | Methylene Blue   | 5      | 2.00 | adsorption + photocatalysis (Vis)    | 99.0 | (5)       |
| TiO <sub>2</sub> /biochar | walnut shells                | 500 | Methyl Orange    | 20     | 0.25 | photocatalytic oxidation (UV)        | 96.9 | (6)       |
| TiO <sub>2</sub> /biochar | Salvinia molesta             | 350 | Acid Orange 7    | 20     | 0.10 | photocatalysis (UV)                  | 90.0 | (7)       |
| TiO <sub>2</sub> /biochar | raw corn cob                 | 550 | Cd(II)           | 50–300 | 1.00 | adsorption                           | 70.0 | (8)       |
| MIL-125(Ti)/biochar       | Cow dung                     | 800 | TC               | 40     | 0.2  | adsorption + photocatalytic (UV+Vis) | 94.6 | Our study |

## References

1. X. Peng, M. Wang, F. Hu, F. Qiu, H. Dai and Z. Cao, *Journal of Alloys and Compounds*, 2019, **770**, 1055-1063.
2. J. R. Kim and E. Kan, *J Environ Manage*, 2016, **180**, 94-101.
3. H. Zhang, Z. Wang, R. Li, J. Guo, Y. Li, J. Zhu and X. Xie, *Chemosphere*, 2017, **185**, 351-360.
4. T. Fazal, A. Razzaq, F. Javed, A. Hafeez, N. Rashid, U. S. Amjad, M. S. Ur Rehman, A. Faisal and F. Rehman, *J Hazard Mater*, 2020, **390**, 121623.
5. A. Khataee, B. Kayan, P. Gholami, D. Kalderis and S. Akay, *Ultrason Sonochem*, 2017, **39**, 120-128.
6. L. Lu, R. Shan, Y. Shi, S. Wang and H. Yuan, *Chemosphere*, 2019, **222**, 391-398.
7. S. Silvestri, M. G. Gonçalves, P. A. da Silva Veiga, T. T. d. S. Matos, P. Peralta-Zamora and A. S. Mangrich, *Journal of Environmental Chemical Engineering*, 2019, **7**.
8. M. Luo, H. Lin, Y. He, B. Li, Y. Dong and L. Wang, *Bioresour Technol*, 2019, **284**, 333-339.
